# Supplementary material for: Safety of fertility preservation techniques before and after anticancer treatments in young women with breast cancer: a systematic review and meta-analysis
Source: PubMed Central journal article supplement — Hum Reprod. 2022 Feb 27;37(5):954–68. doi: 10.1093/humrep/deac035 (PMC9071231; doi:10.1093/humrep/deac035), 2022-02-27
Supplement: deac035_supplementary_table_siii.pdf [file deac035_supplementary_table_siii.pdf]

**Supplementary Table SIII** Sensitivity analysis for mortality in patients that received controlled ovarian stimulation before starting anticancer treatments.

| Study excluded                         | Random effect |           |                 | <i>I</i> -squared (%) | <i>I</i> -squared<br><i>P</i> -value |
|----------------------------------------|---------------|-----------|-----------------|-----------------------|--------------------------------------|
|                                        | RR            | 95% CI    | <i>P</i> -value |                       |                                      |
| <a href="#">Muñoz et al. (2019)</a>    | 0.54          | 0.38–0.76 | 0.001           | 0.0                   | 0.609                                |
| <a href="#">Marklund et al. (2020)</a> | 0.69          | 0.35–1.34 | 0.275           | 0.0                   | 0.878                                |
| <a href="#">Greer et al. (2021)</a>    | 0.50          | 0.34–0.73 | <0.001          | 0.0                   | 0.986                                |
| <a href="#">Moravek et al. (2021)</a>  | 0.54          | 0.38–0.77 | 0.001           | 0.0                   | 0.609                                |

*I*-squared, Higgins index; RR, relative risk.
