# Supplementary material for: Safety of fertility preservation techniques before and after anticancer treatments in young women with breast cancer: a systematic review and meta-analysis
Source: PubMed Central journal article supplement — Hum Reprod. 2022 Feb 27;37(5):954–68. doi: 10.1093/humrep/deac035 (PMC9071231; doi:10.1093/humrep/deac035), 2022-02-27
Supplement: deac035_supplementary_table_siv.pdf [file deac035_supplementary_table_siv.pdf]

human reproduction **SUPPLEMENTARY DATA**

**Supplementary Table SIV** Sensitivity analysis for recurrence rate in breast cancer survivors that received ARTs.

| Study excluded                            | Random effect |           |                 | <i>I</i> -squared (%) | <i>I</i> -squared <i>P</i> -value |
|-------------------------------------------|---------------|-----------|-----------------|-----------------------|-----------------------------------|
|                                           | RR            | 95% CI    | <i>P</i> -value |                       |                                   |
| <a href="#">Goldrat et al. (2015)</a>     | 0.30          | 0.13–0.70 | 0.005           | 0.8                   | 0.365                             |
| <a href="#">Rosenberg et al. (2019)</a>   | 0.39          | 0.19–0.82 | 0.014           | 0.0                   | 0.916                             |
| <a href="#">Condorelli et al. (2021b)</a> | 0.31          | 0.11–0.87 | 0.026           | 17.1                  | 0.299                             |
| <a href="#">Condorelli et al. (2021a)</a> | 0.33          | 0.12–0.90 | 0.030           | 21.2                  | 0.281                             |

*I*-squared, Higgins index; RR, relative risk.
